# Ouabain enhances cell-cell adhesion mediated by $\beta_1$ -subunits of the $\text{Na}^+, \text{K}^+$ -ATPase in CHO fibroblasts.

Claudia Andrea Vilchis-Nestor<sup>1,2</sup>, María Luisa Roldán<sup>1</sup>, Teresita Padilla-Benavides<sup>2</sup> and Liora Shoshani<sup>1,\*</sup>.

<sup>1</sup> Department of Physiology Biophysics and Neurosciences, Center for Research and Advanced Studies, CINVESTAV-IPN, CDMX, MEXICO.

<sup>2</sup> Department of Biochemistry and Molecular Pharmacology, University of Massachusetts Medical School. Worcester, MA, 01605. USA.

\* Corresponding author: Liora Shoshani, PhD.

[shoshani@fisio.cinvestav.mx](mailto:shoshani@fisio.cinvestav.mx); [liora.shoshani@gmail.com](mailto:liora.shoshani@gmail.com), Tel.: +52 55 57473360

## Abstract

Adhesion is an important characteristic of epithelial cells to provide a crucial barrier to pathogens and substances. In polarized epithelial cells, cell-adhesion depends on tight junctions, adherent junctions and the  $\text{Na}^+, \text{K}^+$ -ATPase. All these are located in the basolateral membrane of the cells. The hormone ouabain, a cardiotonic steroid, binds to the  $\alpha$  subunit of the  $\text{Na}^+, \text{K}^+$ -ATPase, and inhibits the pump activity when used at above  $\mu\text{M}$  concentrations. At physiological nM concentrations, ouabain affects the adhesive properties of epithelial cells by inducing the expression of cell adhesion molecules through activation of signaling pathways associated to the  $\alpha$  subunit. Our group showed that non-adherent CHO cells transfected with the canine  $\beta_1$  subunit become adhesive, and that homotypic interactions between  $\beta_1$  subunits of the  $\text{Na}^+, \text{K}^+$ -ATPase occur between neighboring epithelial cells. Therefore, in this study we investigated whether the adhesion between  $\beta_1$  subunits was also affected by ouabain. We used CHO fibroblasts stably expressing the  $\beta_1$  subunit of the  $\text{Na}^+, \text{K}^+$ -ATPase (CHO- $\beta_1$ ) and studied the effect of ouabain on cell adhesion. Aggregation assays showed that ouabain increased the adhesion between CHO- $\beta_1$  cells. Immunofluorescence and biotinylation assays showed that ouabain (50 nM) increases the expression of the  $\beta_1$  subunit of the  $\text{Na}^+, \text{K}^+$ -ATPase at the cell membrane. We also screened the effect of ouabain on activation of signaling pathways in CHO- $\beta_1$  cells, and their effect on cell adhesion. We found that c-Src, is activated by ouabain and is therefore likely to regulate the adhesive properties of CHO- $\beta_1$  cells. Collectively, our findings suggest that the  $\beta_1$  subunits adhesion is modulated by the levels of expression and activation of the  $\text{Na}^+, \text{K}^+$ -ATPase at the plasma membrane, which is regulated by ouabain.

**Keywords:**  $\text{Na}^+, \text{K}^+$ -ATPase ;  $\beta_1$ -subunit; Ouabain; cSrc; pNaKtide; cell adhesion

## Introduction

The Na<sup>+</sup>,K<sup>+</sup>-ATPase or sodium pump is an ubiquitous plasma membrane transporter that creates the ionic gradients that drive the net movement of glucose, amino acids, and ions across cellular membranes [1]. The Na<sup>+</sup>,K<sup>+</sup>-ATPase belongs to the P-type ATPase family, whose members are characterized by the transitory formation of a phosphorylated enzyme intermediate [2]. The pump structurally consists of three subunits: a catalytic  $\alpha$  subunit, an accessory  $\beta$  subunit and a regulatory  $\gamma$  subunit. The catalytic  $\alpha$  subunit is constituted by 10 transmembrane domains (TM), and exchanges 3 Na<sup>+</sup> ions from the cytosol for 2 K<sup>+</sup> ions from the extracellular milieu using the energy released from ATP hydrolysis [3]. The  $\beta$  subunit is constituted by a single TM domain, and a long glycosylated extracellular domain. Its functions are discussed in detail below. The  $\gamma$  subunit is a small, single span TM protein belonging to the FXYD family, differentially expressed in tissues, which modulates the pump's function [4, 5]. In mammals, there are four  $\alpha$  subunit isoforms, three  $\beta$  subunit isoforms and seven FXYD members [6,7].

The  $\beta$  subunit of the sodium pump has different functions that depend on the type of isoform expressed ( $\beta_1$ ,  $\beta_2$  or  $\beta_3$ ), and on the accompanying isoform of  $\alpha$  subunit ( $\alpha_1$ - $\alpha_4$ ) [8]. The main and essential function is to chaperone for the  $\alpha$  subunit [9] contributing to the assembly and arrival of the pump to the plasma membrane [10]. In addition, the  $\beta$  subunit undergoes conformational changes during the catalytic cycle [11]. Different  $\beta$  isoforms have been associated to different K<sup>+</sup> affinities [12]. Furthermore, some studies suggest that the  $\beta_1$  subunit regulates cell polarity, cell motility, epithelial to mesenchymal transition, and oncogenic transformation [13-15]. In epithelia, the  $\beta_1$  isoform functions as a homophilic cell adhesion molecule [16,17]. Moreover, the  $\beta_2$  isoform is an adhesion molecule on glia (AMOG, [18]).

Emerging evidence showed that the Na<sup>+</sup>,K<sup>+</sup>-ATPase may have additional regulatory functions other than pumping ions across cell membranes. Ouabain and related cardiotonic steroids are highly specific Na<sup>+</sup>,K<sup>+</sup>-ATPase ligands that bind to all catalytic  $\alpha$  isoforms [19-21]. Studies from various laboratories have documented an important signaling function of the Na<sup>+</sup>,K<sup>+</sup>-ATPase [8,22]. In epithelia, the sodium pump also acts as a membrane receptor that transduces signals in response to ouabain and related cardiotonic steroids. The binding of ouabain and cardiotonic steroids (at nM concentrations) to the sodium pump activates signaling pathways that resemble those triggered by hormone/receptor interactions, which regulate gene expression, membrane trafficking, cell adhesion, proliferation, and cell death [23-28]. Interestingly, nM concentrations of ouabain neither inhibit K<sup>+</sup> pumping nor disturb the K<sup>+</sup> balance of the cell [29]. Therefore it was proposed that low ouabain

concentrations bind and activate a non-pumping population of the Na<sup>+</sup>,K<sup>+</sup>-ATPase [30, 31].

Ouabain was suggested to be a hormone when Hamlyn and Mathews demonstrated the presence of a substance in plasma similar to ouabain of vegetal origin [20,32]. Thereafter, it was demonstrated that endogenous ouabain is synthesized and secreted by the hypothalamus [33,34], and the adrenocortical gland [35-37]. The status of ouabain as a hormone was clearly recognized upon the discovery of increased concentrations in plasma during exercise, salty meals ingestion, and pathological conditions such as arterial hypertension and myocardial infarction [38-43]. However, its physiological role remained unknown. Work from our group has shown that ouabain binding to the Na<sup>+</sup>,K<sup>+</sup>-ATPase modulates epithelial cell adhesion and communication [29, 44,45].

Our laboratory has studied the role of the Na<sup>+</sup>,K<sup>+</sup>-ATPase  $\beta_1$  subunit in epithelia. We demonstrated that the  $\beta_1$ -subunits of Na<sup>+</sup>,K<sup>+</sup>-ATPases on neighboring cells interact with each other in a species specific manner [46,16]. Numerous studies demonstrated that the intercellular homotypic interaction between  $\beta_1$  subunits of the Na<sup>+</sup>,K<sup>+</sup>-ATPase are important for the stability of adherent junctions (AJ) and integrity of the tight junctions (TJ) and GAP junctions [17, 45, 47]. Thus,  $\beta_1$ - $\beta_1$  interactions between epithelial cells are critical for the integrity of intercellular junctions. Since ouabain modulates different cell-attachment complexes, we wondered whether ouabain also regulates the  $\beta_1$ - $\beta_1$  mediated cell adhesion. In this work we used CHO fibroblasts, which lack the classical cell-cell adhesion complexes (TJs, AJ), and that stably express a canine  $\beta_1$  subunit in the plasma membrane. This model system targets efficiently the Na<sup>+</sup>,K<sup>+</sup>-ATPase to the membrane contributing to the cell-cell contact [46]. To determine whether  $\beta_1$ - $\beta_1$  interactions are modulated by ouabain, we investigated the effect of a physiological concentration (50 nM) of ouabain on the adhesion of CHO cells overexpressing the dog  $\beta_1$  subunit. This work shows that ouabain increases the amount of Na<sup>+</sup>,K<sup>+</sup>-ATPase at the cell membrane, rendering increased cell adhesion properties mediated by  $\beta_1$ - $\beta_1$  interactions. This effect is facilitated by the ouabain-dependent activation of kinases such as cSrc, ERK1/2 and AKT which contribute to enhance the adhesive properties of CHO $\beta_1$  cells.

## Results

### ***Cell-Cell adhesion of CHO fibroblasts expressing dog $\beta_1$ subunit of Na<sup>+</sup>,K<sup>+</sup>-ATPase is mediated by $\beta_1$ homotypic interactions in trans***

Adherent CHO fibroblasts are well attached to the extracellular matrix and the substrate, but establish weak cell-cell contacts, which are easily disrupted by gentle shaking or pipetting [46, 52, 53]. We have shown that CHO fibroblasts transfected with the canine  $\beta_1$  subunit of the  $\text{Na}^+, \text{K}^+$ -ATPase ( $\text{CHO}\beta_1$ ) form large cellular aggregates, due to an increase in cell-cell adhesion [46]. Moreover, we demonstrated that the epithelial  $\beta_1$  subunit of  $\text{Na}^+, \text{K}^+$ -ATPase is an adhesion molecule that mediates the interaction of sodium pumps on neighboring cells by establishing homotypic interactions [16]. Therefore, we hypothesized that the cell-cell adhesion observed in  $\text{CHO}\beta_1$  cells is mediated by  $\beta_1\text{-}\beta_1$  interactions. To address this question, we investigated the subcellular localization of the dog  $\beta_1$  subunit and the cell-cell adhesion properties of CHO cells. Wild type CHO cells do not express the  $\beta_1$  subunit of the sodium pump (Fig. 1A left panel). Confocal microscopy analyses showed that CHO cells transfected with the plasmid encoding for the canine  $\beta_1$  subunit, express the protein in the plasma membrane, resembling the distribution observed in epithelial MDCK cells (Fig. 1A Middle and right panels). Dispase assays showed that wild type CHO cells are unable to maintain cellular aggregates (Fig. 1B left panel). However, the cell-cell adhesion capability of CHO cells increased upon transfection of the canine  $\beta_1$  subunit, as these cells maintain larger cellular aggregates upon dispase disruption, similar to those of the CHO cells expressing the adhesion molecule E-cadherin ( $\text{CHO E-cadh}$ ; Fig. 1B). On average, the aggregates formed by  $\text{CHO}\beta_1$  cells are significantly larger (3 fold) than control wild type CHO cells; but similar in size to those observed in the  $\text{CHO E-cadh}$  cells (Fig. 1C).

To confirm the hypothesis that the cell-cell adhesion observed in  $\text{CHO}\beta_1$  cells is due to  $\beta_1\text{-}\beta_1$  interactions, we tested whether the soluble domain of the  $\beta_1$  subunit would impair the formation of cellular aggregates in this cell line. We took advantage of a truncated version of the canine  $\beta_1$  subunit that only expresses the soluble extracellular C-terminal domain (Sec  $\beta_1$ ) [16, 51].  $\text{CHO}\beta_1$  cells were allowed to interact with supernatants obtained from CHO Sec $\beta_1$  cells containing this protein, and the formation of cellular aggregates was analyzed by light microscopy. Figure 1D shows that the presence of the soluble domain of the dog  $\beta_1$  subunit (Sec $\beta_1$ ) reduced the size of the  $\text{CHO}\beta_1$  cellular aggregates. Statistical analyses confirmed that the aggregates formed by  $\text{CHO}\beta_1$  cells were significantly smaller (~50%) than control cells (Fig. 1E). Interestingly, confocal microscopy analyses showed that  $\text{CHO}\beta_1$  cells pre-incubated for 24 h with Sec $\beta_1$  presented a proliferation defect compared to control cells (Fig. 1D, lower panel). These results confirmed that cell-cell adhesion dependent in the  $\text{Na}^+, \text{K}^+$ -ATPase is at least partially due to an

interaction between  $\beta_1$  subunits, and further showed that the cell culture model based on CHO $\beta_1$  cells is suitable for studying  $\beta_1$ - $\beta_1$  interactions.

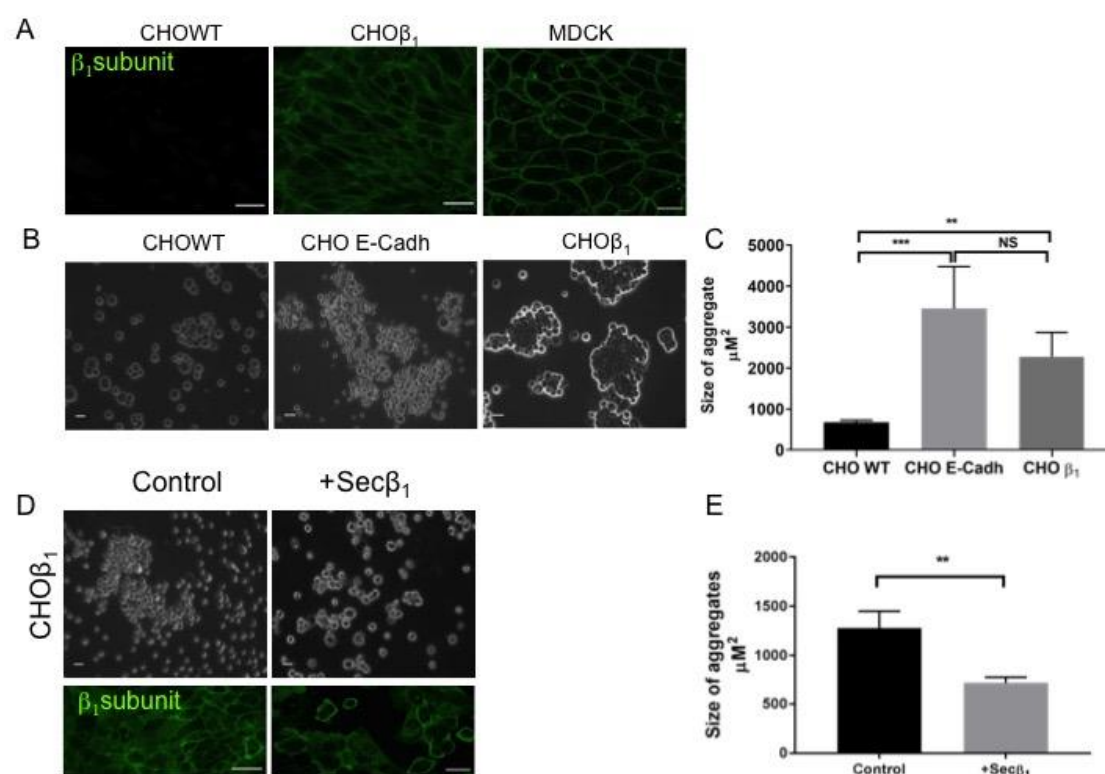

**Figure 1.** Cell-cell adhesion of CHO fibroblasts expressing the canine  $\beta_1$  subunit of Na<sup>+</sup>,K<sup>+</sup>-ATPase (CHO $\beta_1$ ) is mediated by  $\beta_1$ - $\beta_1$  interactions. (A) Representative confocal microscopy images of CHO wild type, CHO $\beta_1$  and MDCK cells immunostained against the dog  $\beta_1$  subunit. Scale bar = 30  $\mu$ m. (B) Representative light microscopy images of CHO wild type, CHO $\beta_1$  cells and CHO E-Cadherin after the dispase aggregation assay. Scale bar = 20  $\mu$ m. (C) Quantification of the measured size of the aggregates is depicted as the area of their horizontal projections. Values represent the mean from three independent biological replicates  $\pm$  SE. Statistical analysis was Kruskal Wallis and Dunnet's t-test for multiple comparisons;  $P < 0.005$ . (D) Upper panels are representative phase-contrast micrographs of aggregation assay as in (B). Scale bar = 20  $\mu$ m. Lower panels are representative confocal microscopy images of dog  $\beta_1$  subunit in CHO $\beta_1$  cells incubated for 24 h in the absence (left) or presence of Sec $\beta_1$  (right). (E) Quantification of the mean size of cellular aggregates of CHO $\beta_1$  cells treated or not with Sec $\beta_1$ . Statistical analysis was t-student test of three independent biological experiments  $\pm$  SD;  $P < 0.005$ .

### ***Ouabain increases cell-cell adhesion of CHO $\beta_1$ cells***

Physiological concentrations of ouabain modulate cell-cell interactions [26,29]. Therefore, we hypothesized that ouabain may also modulate the cell-cell interactions that are mediated by the  $\beta_1$  subunits of the sodium pump. To test this hypothesis, we used the dispase adhesion assay, to further investigate the adhesive properties of CHO $\beta_1$  cells in absence or presence of ouabain. Figure 2 shows a specific and significant increase of the size of CHO $\beta_1$  cells aggregates upon



treatment with ouabain at physiological concentration (50 nM; compare Fig. 2A upper and lower panels). Importantly, the inhibitory ouabain concentration (100  $\mu$ M) prevented the cell adhesion phenotype observed in CHO $\beta_1$  cells, to a level similar to wild type cells. Therefore, we concluded that physiological concentrations of ouabain increase cell adhesion mediated by  $\beta_1$ - $\beta_1$  interactions of CHO $\beta_1$  cells.

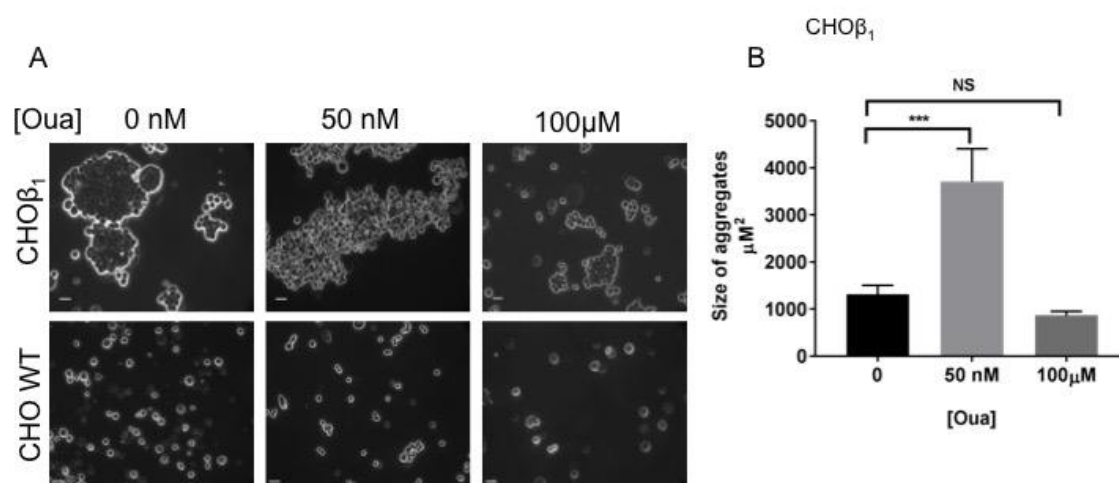

**Figure 2.** Physiological concentrations of ouabain increase cell-cell adhesion of CHO $\beta_1$  cells. (A) Representative microscopy images of cell aggregation of CHO $\beta_1$  cells (upper panels) and CHO WT cells (lower panels) treated or not with ouabain (50 nM, 100 $\mu$ M). (B) Quantification of the mean size of cellular aggregates of CHO $\beta_1$  treated with 0, 50nM and 100 $\mu$ M ouabain of three independent biological replicates is depicted. Statistical analysis was ANOVA one way and Dunn's tests for multiple comparison, bars represent  $\pm$  SE; \*\*\* P<0.0001.

### ***The interactions of $\beta_1$ - $\beta_1$ subunits are stable in vitro independently of ouabain treatment***

The effect of ouabain on cell-cell interactions mediated by  $\beta_1$  subunits could be explained if this hormone induces a conformational change in  $\beta_1$  subunits resulting in a more adhesive molecule. Accordingly, ouabain binding to its receptor, the  $\alpha$  subunit of the pump, should be sufficient for inducing the same effect on  $\beta_1$ - $\beta_1$  interactions *in vitro*, out of the cellular context. Therefore, we studied whether ouabain directly affects  $\beta_1$ - $\beta_1$  subunits interaction in a pool down assay. In this case, we used the canine  $\beta_1$  tagged with a hexa-histidine repeat (CHO $\beta_1$  His<sub>6</sub>) immobilized on Ni<sup>2+</sup>-NTA as the bait. The prey was obtained from total cellular extract of CHO $\beta_1$  cells tagged with the yellow fluorescent protein (CHO $\beta$ -YFP). CHO wild type cells (CHO WT) were used as negative control. Cellular extracts (bait and prey) were allowed to interact in absence or presence of ouabain, and the formation of complexes interacting  $\beta_1$  subunit were analyzed by Western blot. Figure 3 shows that the immobilized CHO $\beta_1$  His<sub>6</sub> was capable to interact with the recombinant  $\beta_1$

YFP obtained from cellular extracts. Importantly, the interaction *in vitro* was maintained even in the presence of ouabain (Fig. 3A). Statistical analyses demonstrated that ouabain treatment did not affect significantly the amount of interacting proteins (Fig. 3B). All eluted fractions contain  $\alpha$  subunit, which means that the  $\beta_1$ His<sub>6</sub> is assembled with the  $\alpha$  subunit on the Ni<sup>2+</sup>-NTA. The data suggest that the effect of ouabain on cell-adhesion does not occur directly on  $\beta_1$  subunits, and it is likely dependent on additional cellular components.

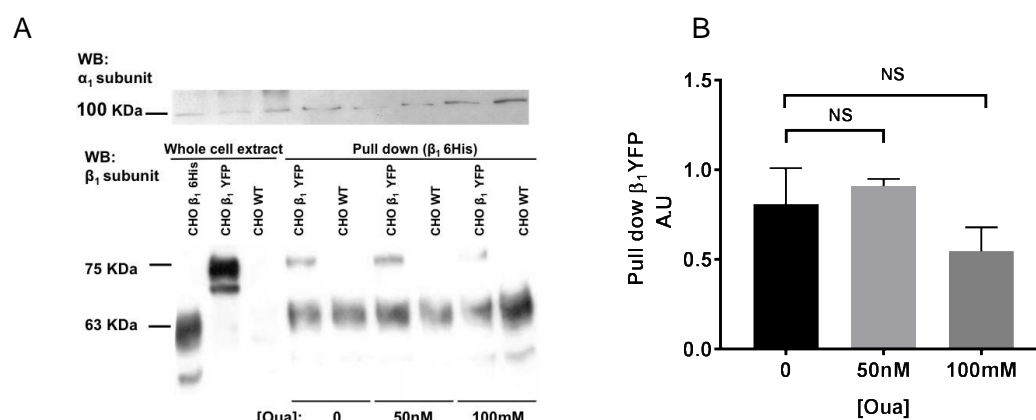

**Figure 3. An indirect interaction between ouabain and the  $\beta_1$  subunit of Na<sup>+</sup>,K<sup>+</sup>-ATPase is necessary for the adhesive phenotype triggered by this hormone.** (A) Western blot analysis of  $\beta_1$  and  $\alpha_1$  subunits of the Na<sup>+</sup>,K<sup>+</sup>-ATPase: cell lysate of CHO $\beta_1$ -6His, CHO $\beta_1$ -YFP and CHO-WT cells (three left lanes); Pull Down assay between CHO $\beta_1$ -6His as a bait and CHO $\beta_1$ -YFP or CHO-WT as a prey without and with 50 nM and 100 mM Ouabain (six right lanes). The 63 KDa band corresponds to the  $\beta_1$ -6His, and the higher-molecular-weight band corresponds to the  $\beta_1$ -YFP (75KDa) both recognized by the same anti- $\beta_1$  subunit antibody. (B) Densitometric quantification of the results presented in A. In Pulled down fractions, density of the  $\beta_1$ -YFP bands was normalized with the  $\beta_1$ 6His band. Data represent the mean of three independent replicates. Statistical analysis was Kruskal Wallis and Dunn's test for multiple comparisons. Error bars,  $\pm$  SE; NS, P>0.05.

### ***Ouabain increases the expression and localization of the sodium pump at the plasma membrane***

It has been shown that treatment with cardiotonic steroids (ouabain and 21-benzylidene digoxin) increases the expression level of the  $\alpha$  subunit of sodium pump in the typical pig kidney tubular epithelium cell line LLC-PK1 and MDCK [54, 55]. Therefore, we wondered whether the cell adhesion effect of ouabain induced in CHO $\beta_1$  cells was due to increase in the expression of the sodium pump at the plasma membrane. As expected, treatment of MDCK cells with ouabain at physiological concentrations (10-50 nM) increased the expression of the  $\beta_1$  subunit at the plasma membrane (Fig. 4A), which is in agreement with the observations of

Rocha, and coworkers (2014). On the other hand, treatment with  $\mu\text{M}$  concentrations of ouabain leads to detachment of the MDCK cells (Fig. 4A; [56]). Considering these phenotypes, we evaluated the effect of ouabain on the localization of the  $\beta_1$  subunit in the monolayer of CHO $\beta_1$  cells. Confocal microscopy analyses showed that in our model system, the  $\beta_1$  subunit presents a similar distribution to epithelial cells upon ouabain treatments (Fig. 4B). The membranal localization of the sodium pump was disrupted at higher concentrations of ouabain ( $\mu\text{M}$ ) (Fig. 4B). Importantly, the fluorescence intensity of the  $\beta_1$  subunit at the plasma membrane only increased significantly upon treatment with 50 nM ouabain (Fig. 4C).

To confirm that physiological concentrations of ouabain increase the sodium pump expression at the plasma membrane, we used a surface biotinylation assay. Figure 4D shows a representative Western blot analysis of the  $\beta_1$  subunit located in the plasma membrane of CHO $\beta_1$  cells treated with 50 nM ouabain. Statistical analyses of three independent biological experiments showed a small but significant increase in the membranal expression of the  $\beta_1$  subunit in CHO $\beta_1$  cells (Fig. 4D). Our results suggest that the observed increase in cell adhesion mediated by  $\beta_1$  subunits is a result of ouabain binding to the  $\alpha$  subunit, which may lead to the activation of signaling pathways that promote the expression and delivery of the pump to the plasma membrane.

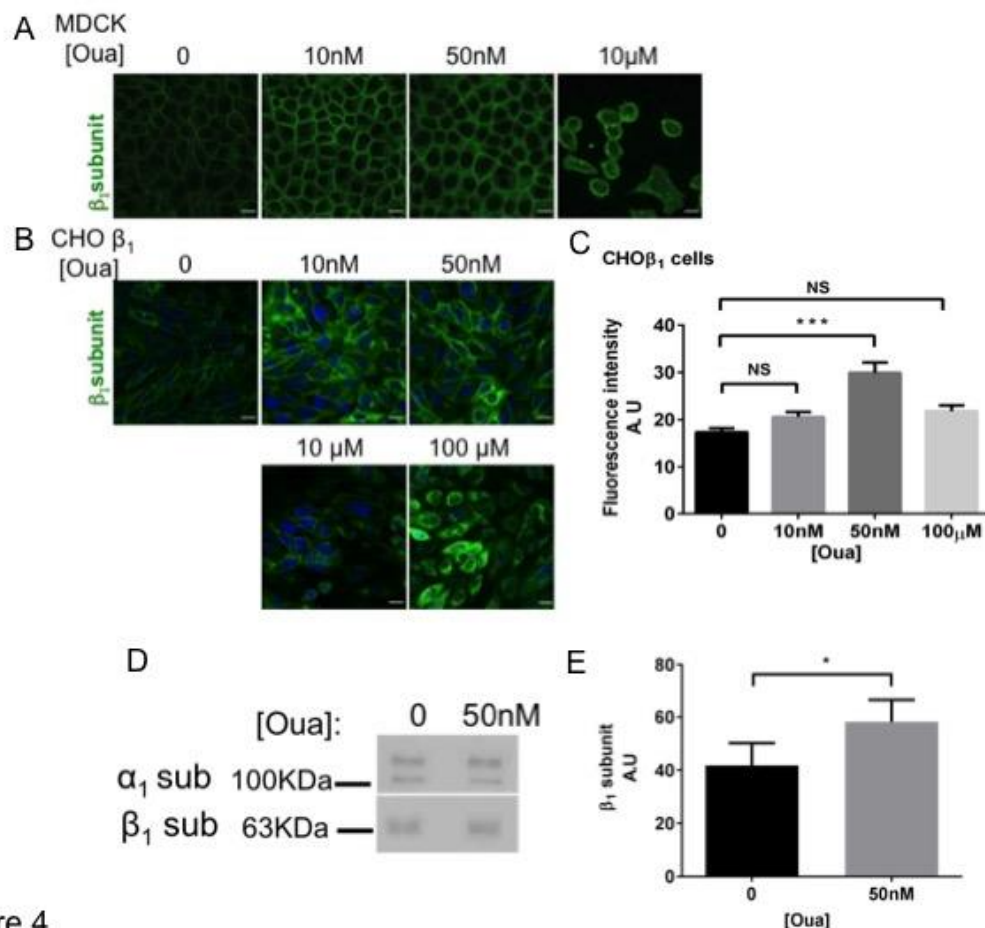

Figure 4



**Figure 4.** Ouabain increases the expression of the Na<sup>+</sup>,K<sup>+</sup>-ATPase at the plasma membrane of CHO fibroblasts transfected with the canine  $\beta_1$  subunit. (A) Representative confocal microscopy images of the dog  $\beta_1$  subunit in MDCK cells incubated with 10, 50 nM and 10  $\mu$ M of Ouabain for 24 h. (B) Representative confocal microscopy images of the dog  $\beta_1$  subunit in CHO $\beta_1$  cells incubated for 24 h with 10, 50 nM, 10, and 100  $\mu$ M of ouabain. (C) Quantification of the fluorescence intensity observed at the plasma membrane of CHO $\beta_1$  cells (10 cells per field of three independent biological replicates). Statistical analyses were ANOVA one way test, and Dunn's test for multiple comparisons. The data represent the mean  $\pm$  SE; \*\*\*P<0.0001, NS. (D) Representative Western blot analysis of  $\beta_1$  and  $\alpha_1$  subunits of the Na<sup>+</sup>,K<sup>+</sup>-ATPase of CHO $\beta_1$  cells biotinylated after treatment with 50 nM ouabain for 24 h. (E) Densitometry quantification of biotinylated  $\beta_1$  subunit after treatment with ouabain. The data represent the mean of three independent biological replicates  $\pm$  SD, Statistical analyses was t-student test; \* P <0.05.

### ***The $\beta_1$ - $\beta_1$ adhesion induced by ouabain depends on the activation of cSrc and AKT signaling pathway***

Previous studies demonstrated that binding of cardiotonic steroids such as ouabain to the sodium pump stimulates multiple kinase cascades [57]. Therefore, the effect of ouabain on the  $\beta_1$ - $\beta_1$  interaction could be explained by the potential activation of some components from the signaling machinery that is known to modulate cell junctions such as TJs, AJs and GAP junctions [29,58]. We first screened for signaling proteins of the family of tyrosine kinases that were differentially activated comparing between CHO $\beta_1$  and CHO wild type cells. Overall, CHO $\beta_1$  cells had more active signaling proteins than wild type cells, indicating that the increased expression of Na<sup>+</sup>,K<sup>+</sup>-ATPase in CHO fibroblast per se induces the activation of signaling cascades that are usually of low activity (Figure 1). Then, we treated CHO $\beta_1$  cells with ouabain and identified various kinases that were altered when treating the cells with 50 nM Ouabain (Figure S2). Of all modified pathways detected, we focused on the potential mechanisms by which cSrc, AKT, and ERK1/2 contribute to the interaction between  $\beta_1$  subunits. Therefore, we investigated whether the inhibition of those pathways would impair the effect of ouabain on cell adhesion mediated by  $\beta_1$  subunits. The selected phosphorylation inhibitors were Dasatinib for cSrc, Perifosine for AKT, and U01266 for ERK1/2. From the three kinases selected, phosphorylated cSrc increased upon treatment with ouabain compared to control cells (Fig. 5A). Importantly, incubation of the CHO $\beta_1$  cells with all the inhibitors was effective and prevented the corresponding kinase phosphorylation (Fig. 5A-C).

To test the effect of kinase inhibition in the adhesive properties of CHO $\beta_1$  cells dependent on ouabain (50 nM), we analyzed the size of the cellular aggregates. Representative light microscopy imaging showed that inhibition of cSrc (Fig. 5D),

and AKT (Fig. 5E) impaired the formation of the ouabain-induced aggregates. No changes on the size of the cellular aggregates of CHO $\beta_1$  cells that were inhibited for ERK1/2 were observed (Fig. 5F). Consistently, statistical analyses showed significant differences in the size of the aggregates of CHO $\beta_1$  cells treated with either perifosine or dasatinib; no significant differences were observed for CHO $\beta_1$  cells treated with UO126 when compared to control cells (Fig. 5G). These data suggest that ouabain binding to the sodium pump stimulates at least cSrc kinase and AKT signaling pathways, which may be involved in the regulation of  $\beta_1$ - $\beta_1$  mediated cell adhesion.

### ***pNaKtide reduces cell adhesion effect induced by ouabain***

The Na<sup>+</sup>,K<sup>+</sup>-ATPase interacts with cSrc kinase and forms a complex that serves as a receptor for ouabain to stimulate various protein kinase cascades [30]. Specifically, ouabain binding to the Na<sup>+</sup>,K<sup>+</sup>-ATPase disrupts this interaction and results in the assembly and activation of different signaling pathways [59]. Our results thus far have shown that the adhesive properties of  $\beta_1$  subunits require the cellular context to occur, since no effect of ouabain was observed *in vitro* (Fig. 3). Moreover, the increased phosphorylation of cSrc in CHO $\beta_1$  cells treated with ouabain (Fig. 5A), was reversed by the cSrc kinase inhibitor, and prevented formation of cellular aggregates (Fig. 5D). Therefore, we hypothesized that the  $\beta_1$  subunit adhesive properties dependent in ouabain, could be partially due to the activation of Na<sup>+</sup>,K<sup>+</sup>-ATPase/cSrc complex. To test this hypothesis we took advantage of the pNaKtide, which is a peptide that antagonizes the effect of ouabain on cSrc [60], and assayed for cell-adhesion in the presence of ouabain and with or without the pNaKtide. Figure 6A shows a representative Western blot of the ouabain-dependent increase in the phosphorylation of cSrc (~70% higher than control cells). In the presence of 1  $\mu$ M of the pNaKtide, the effect on cSrc phosphorylation was abolished, and remained at similar levels than control cells. No changes were detected in the expression of the  $\alpha$  subunit of the sodium pump. Finally, we analyzed the effect of the antagonist in the formation of ouabain-dependent aggregates of CHO $\beta_1$  cells. Representative light microscopy images showed that the size of the aggregates is smaller compared to those of ouabain stimulated cells (Fig. 6B). Statistical analyses showed that in the presence of the pNaKtide the size of ouabain-stimulated aggregates is similar in size than those of control cells (Fig. 6C). These results support our hypothesis that the adhesion effect of  $\beta_1$  subunits stimulated by ouabain is partially regulated by cSrc activation.

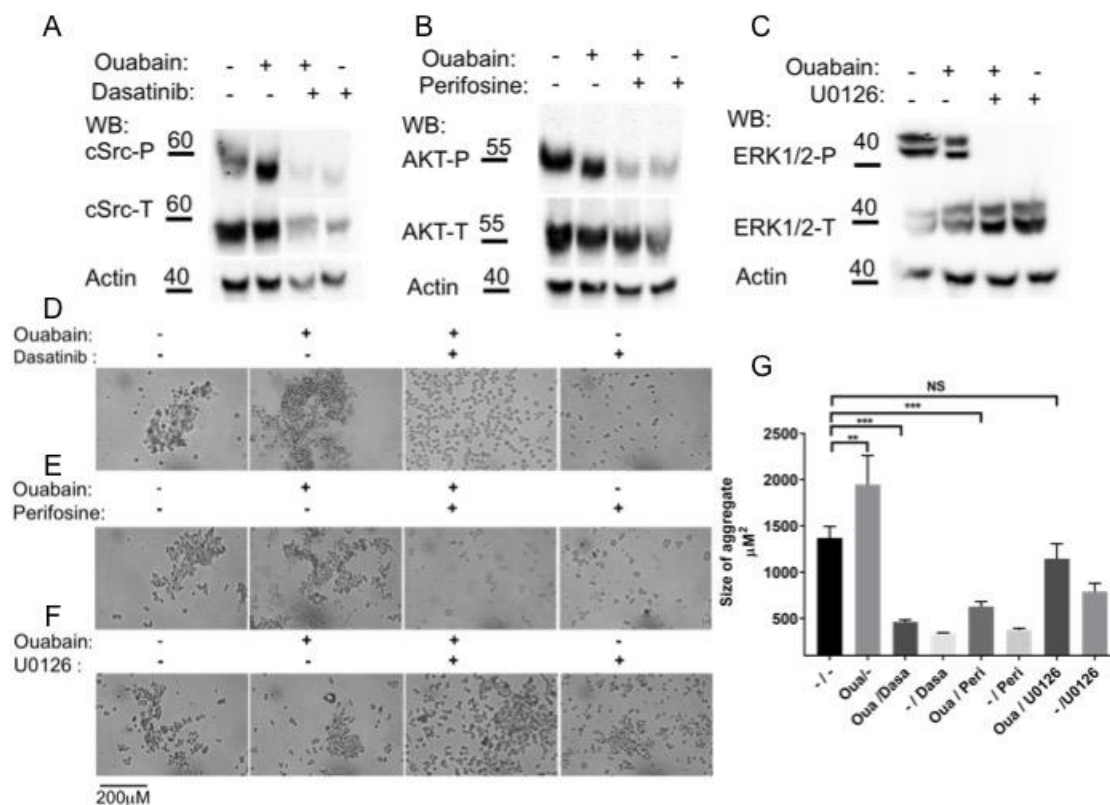

**Figure 5.** Src and AKT signaling pathways are involved in ouabain modulation of cell-cell Adhesion of CHO $\beta_1$  fibroblasts. Representative Western blot analysis of Src-P (A), AKT-P (B) and ERK1/2-P (C) of CHO $\beta_1$  cells treated without and with 50 nM ouabain, and in the presence or absence of the specific kinase inhibitor: Src (Dasatinib, 100 nM); AKT (Perifosine, 10  $\mu\text{M}$ ); and EKR1/2 (U0126, 10  $\mu\text{M}$ ) (n=3). The inhibitors were added 1 h prior incubation with ouabain for 60 min. Representative images taken for Dispase aggregation assay of CHO $\beta_1$  cells treated with 50nM ouabain and the specific inhibitors for Src, Dasatinib (D); AKT, Perifosine (E) and EKR1/2, U0126 (F). (G) Quantification of the size of cellular aggregates. The data represent the mean of three independent biological replicates  $\pm$  SE. Statistical analysis was Kruskal Wallis and Dunn's test for multiple comparisons. \*\*\* P<0.0001, \*\* P<0.001, NS P>0.05.

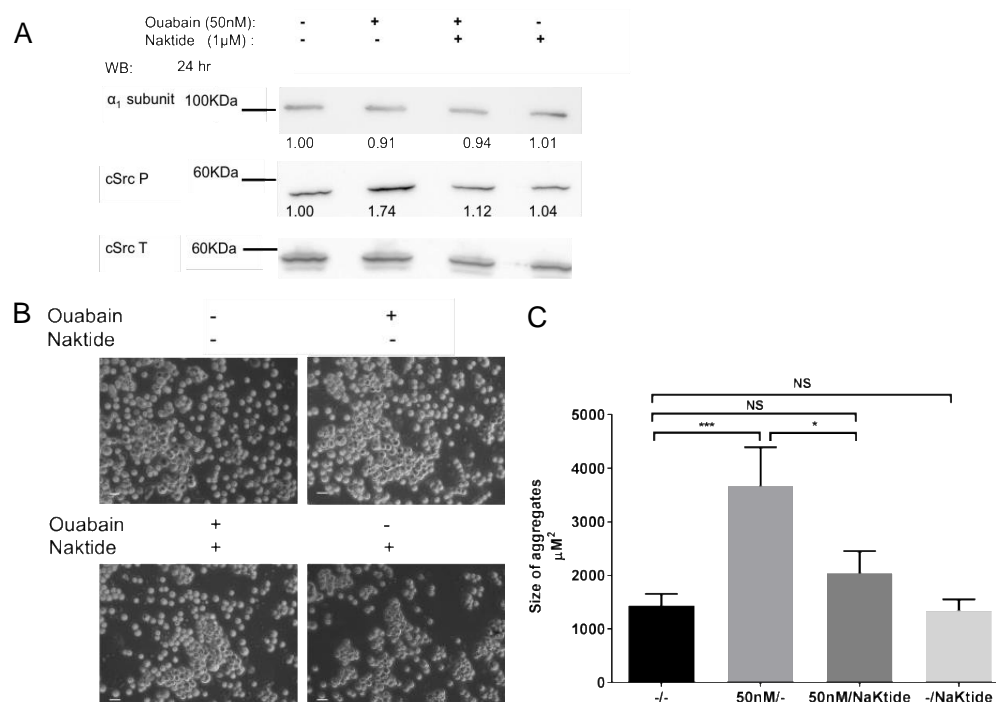

**Figure 6.** pNaKtide inhibits Ouabain-activated cSrc and ouabain induced  $\beta_1$ -mediated cell adhesion in CHO $\beta_1$  cells. (A) Representative Western blot of cSrc activation (cSrcP) and total cSrc (cSrcT), and the  $\alpha_1$  subunits of CHO $\beta_1$  cells treated with 1 mM pNaKtide for 24 h (n=3). (B) Representative microscopy images of the disperse assay of CHO $\beta_1$  cells treated with pNaKtide and ouabain for 24 h; scale bar = 20  $\mu$ m. (C) Quantification of the size of cellular aggregates. The data represent the mean of three independent biological replicates  $\pm$  SE. Statistical analyses was Kruskal Wallis and Dunn's test for multiple comparisons. \*\*\* P<0.0001; \* P<0.05; NS P>0.05.

## Discussion

As all mammalian cells, CHO fibroblasts express the necessary amount of sodium pumps at their plasma membrane for maintaining a suitable ionic balance that would permit their viability. In our overexpression system, the assembled  $\alpha_1\beta_1$  dimer in CHO $\beta_1$  cells is targeted to the plasma membrane and concentrated at cell-cell contacts adopting an epithelial-like phenotype and maintain both cell-cell and cell-substrate adhesion [46]. This phenotype makes the CHO $\beta_1$  overexpression system an ideal model to investigate cell adhesion. Using cellular and biochemical strategies our group demonstrated that  $\beta_1$  subunits of neighboring cells can interact directly in a species-specific manner [16]. In the present work we show that increasing the density of the  $\beta_1$  subunit of Na<sup>+</sup>-pump in cell contacts of CHO fibroblasts is sufficient for displaying a cell-adhesive phenotype. These adhesive properties are mediated by  $\beta_1$  interactions which are regulated by signaling cascades conserved in establishment and maintenance of classical epithelial adhesion complexes [26,29,45].

Early works from Nelson's group on epithelial cell polarity have shown that expression of E-cadherin in L-fibroblasts, which lack surface polarity resulted in membrane domains with apical and basolateral identities [61]. Remarkably, the

endogenous Na<sup>+</sup>-pumps in those experiments were recruited to cell-cell contacts. Our results show that CHO fibroblasts transfected with E-cadherin, a Ca<sup>2+</sup>-dependent cell adhesion molecule, or with the  $\beta_1$  subunit, a Ca<sup>2+</sup>-independent adhesion molecule, display similar aggregation properties. To validate that cell-cell adhesion of CHO $\beta_1$  cells was in fact due to  $\beta_1$ - $\beta_1$  interactions, cellular aggregation was challenged with Sec $\beta_1$ , the soluble extra-cellular domain of the canine  $\beta_1$  subunit. As expected, this truncated version of the  $\beta_1$  prevented the ouabain induced cell-cell adhesion properties of CHO $\beta_1$  cells. These results strongly suggest that sec $\beta_1$  competes for cell-cell adhesion mediated by  $\beta_1$  subunits on neighboring cells. And that ouabain-induced cell-cell adhesion is indeed through  $\beta_1$ - $\beta_1$  interactions. Remarkably, Sec $\beta_1$  blocks cell-cell aggregation between CHO $\beta_1$  cells only when it is added short time after seeding, before the formation of a confluent monolayer. This observation indicates that Sec $\beta_1$  is not able to compete with already formed  $\beta_1$ - $\beta_1$  interactions but is able to interact with non-occupied  $\beta_1$  subunit and prevent cell-cell adhesion mediated by  $\beta_1$  subunits. Moreover, CHO  $\beta_1$  cells pre-incubated with sec $\beta_1$  do not reach confluence and are apparently not proliferating. The cells form small patches and many single cells are observed. Usually, contact naïve epithelial cells do not express the Na<sup>+</sup>-pump at the plasma membrane [62]. Importantly, MDCK cells co-cultured with CHO wild type cells do not express the Na<sup>+</sup>,K<sup>+</sup>-ATPase at the heterotypic contacting membrane [46]. Nevertheless, some of the CHO $\beta_1$  single cells showed a highly fluorescent signal at the plasma membrane, which corresponded to the  $\beta_1$  subunit. Therefore, it is plausible that these contact naïve CHO $\beta_1$  cells, are actually surrounded by soluble Sec $\beta_1$  molecules associated with the membrane-bound  $\beta_1$  subunit and that it is mimicking cell-cell contacts. As such, we hypothesize that the apparent proliferation defect is due to a contact inhibition effect induced by Sec $\beta_1$ . These data open a new paradigm on the modulation of cell proliferation dependent on the sodium pump. Altogether, these results confirm that cell-cell adhesion of CHO fibroblasts that overexpress Na<sup>+</sup>,K<sup>+</sup>-ATPase is mainly based on  $\beta_1$ - $\beta_1$  interactions between neighboring cells.

Ouabain binding to  $\alpha$  subunit of the epithelial Na<sup>+</sup>,K<sup>+</sup>-ATPase has a dual effect on the pump, high concentrations of ouabain (>300 nM) triggers pump inhibition and cell detachment [44,56]. Low concentrations of ouabain increases sodium pump activity [63,64] and stimulate signaling routes in a cellular context dependent manner [65]. In epithelial MDCK cells, low ouabain concentrations (10-100 nM) modulate cell-cell contacts such as TJs, AJs and GAP Junctions [26, 29, 44, 45]. We analyzed the effect of ouabain on  $\beta_1$ - $\beta_1$  mediated cell adhesion. Our results show that CHO $\beta_1$  cells incubated with low concentration of ouabain (50 nM) make bigger aggregates than the non-treated ones, while incubation with high concentration of ouabain (100  $\mu$ M) does not enhance cell-cell adhesion. Thus we conclude that physiological concentrations of ouabain induce an increase in  $\beta_1$ - $\beta_1$  interaction in CHO $\beta_1$  cells.

Then we asked whether ouabain has a direct or indirect effect on the  $\beta_1$ - $\beta_1$  interaction. Ouabain binding to the  $\alpha$  subunit could induce a localized conformational change that would make the  $\beta_1$  subunit more adhesive; which then could be considered as a direct effect. For instance, fluorometry assays identified three positions on the  $\beta_1$  subunit, that indicate that  $\alpha$  and  $\beta$  subunits move toward each



other during conformational transition, and produce a conformational rearrangement [66, 67]. Additionally, ouabain binding produce conformational rearrangements in  $\alpha$  subunit of the sodium pump [68]. To further support this idea, our *in vitro* experiments showed that although the  $\alpha$  subunit, is present during the immobilization on Ni-NTA and pool down assays, ouabain treatment does not modify  $\beta_1$ - $\beta_1$  interaction. As such, our results suggest that ouabain does not modify the adhesion between  $\beta_1$  subunits directly and that it requires additional cellular components to fulfil this function. In this regard, binding of ouabain to  $\alpha$  subunit could activate signaling cascades that would up-regulate the amount of  $\text{Na}^+, \text{K}^+$ -ATPase exposed to the extracellular space and thus increase indirectly cell-cell adhesion mediated by  $\beta_1$  subunits. During last years it was established that the  $\text{Na}^+, \text{K}^+$ -ATPase is not just a pump [31,69, 70]. Experimental evidence strongly indicate that epithelial cells contain at least two populations of  $\text{Na}^+, \text{K}^+$ -ATPases: A pumping and a signaling (non-pumping) one [23, 59, 70]; which could also be the case for transfected CHO $\beta_1$  fibroblasts. Overexpression of  $\beta_1$  subunit up regulates the expression of  $\alpha$  subunit [31, 71]. Both are assembled in endoplasmic reticulum and targeted to the plasma membrane [72]. Consistent with this idea, confocal microscopy and surface biotinylation analyses performed in this study show that ouabain stimulates the expression and delivery of the pump to the plasma membrane. Apparently, the signaling population is increased because we observed that even without ouabain the basal expression of cSrc, AKT, and ERK1/2 is increased in comparison to non-transfected CHO cells (Sup 1). Moreover, physiological concentrations of ouabain stimulated the activation of cSrc; furthermore, the pNaKtide which only binds to cSrc associated with  $\text{Na}^+, \text{K}^+$ -ATPase, successfully reverted the effect of ouabain on cSrc activation and cell-cell adhesion. In addition, AKT also seems to regulate the ouabain-dependent cell-cell adhesion observed in CHO $\beta_1$  fibroblasts, since the specific inhibitor of AKT abolished the  $\beta_1$ -mediated cell-cell adhesion. This is not surprising as it has been shown that AKT trans-activates IP3K which forms part of the signaling complex in association with  $\text{Na}^+, \text{K}^+$ -ATPase [73,74]. On the other hand, the inhibition of ERK signaling cascade had a minor effect in the ouabain-dependent cellular aggregation. This might be partially explained by the fact that ERK1/2 is not the only signaling effector activated by cSrc [75,76]. Moreover, our initial screening revealed various signaling proteins that were not studied here and that are probably involved such as TrkB, EphB4 and PDGFR. Future studies will be directed to understand the participation of these signaling molecules in the  $\beta_1$ - $\beta_1$  adhesion phenotype.

All together our results suggest that overexpression of  $\beta_1$  subunit in CHO cells increases the population of  $\text{Na}^+, \text{K}^+$ -ATPases at the plasma membrane. This pool of pumps is most probably involved in mediating  $\beta_1$ - $\beta_1$  interactions between neighboring cells. Whether these proteins have an active role in ion transport remains to be elucidated. However, a plausible model would involve the activation of cSrc and AKT upon stimulation of CHO $\beta_1$  cells with physiological concentrations of ouabain. These signaling cascades would result in the overexpression of adherent pumps targeted to cell contacts at the plasma membrane. Nonetheless, an open question that would have to be addressed in the future is if CHO $\beta_1$  cells form

signalosomes, as epithelial cells do and if  $\beta_1$ - $\beta_1$  interaction occurs between specific pools (pumping and non-pumping pool) or not.

## Materials and Methods

### Cell Culture

Starter Cell lines, MDCK (Madin-Darby Canine Kidney, CCL-34) and CHO-K1 (Chinese hamster ovary) were obtained from the American Type Culture Collection. CHO-K1 cells were cultured in a mixture of F12/DMEM (1132-082, Invitrogen), supplemented with 10% fetal calf serum (FCS) (200-6170, Invitrogen), 100 U/ml penicillin, and 100  $\mu$ g/ml streptomycin (600-5145, Invitrogen) and MDCK cells were cultured in DMEM (430-1600 Invitrogen) supplemented with 10% fetal calf serum (FCS) (200-6170, Invitrogen), 100 U/ml penicillin, and 100  $\mu$ g/ml streptomycin (600-5145, Invitrogen). Cells were grown at 36.5°C a 5% CO<sub>2</sub> atmosphere, 90% humidity (Forma Scientific CO<sub>2</sub> incubator, Steri-Cult 200).

For all experiments, the cells were depleted of serum 24 h before adding different concentrations of ouabain (10 nM, 50 nM, 100 nM 10  $\mu$ M or 100  $\mu$ M as indicated in the figures (3125, Sigma).

CHO-K1 cells were transfected with pCIN4- $\beta_1$  (CHO $\beta_1$ ), (pIRESneo-His<sub>6</sub> (CHO $\beta_1$  His<sub>6</sub>), and pEYFP- $\beta_1$  dog (CHO $\beta_1$  YFP) plasmids as previously described [16, 46, 48], CHO-K1 cells transfected with EcDendra [49] were a kind gift of P. Nava Cinvestav, Mexico. The construct for secreted ecto-domain of dog  $\beta_1$  subunit (sec $\beta_1$ ) was a kind gift of D. M. Fambrough, and was generated as previously reported [50]. Sec $\beta_1$  was transfected in CHO cells as described in Padilla-Benavides 2010. CHO sec $\beta_1$  cells were cultured in serum free media for 4 days before collecting the conditioned medium containing the ectodomain of  $\beta_1$  subunit (Sec $\beta_1$ ) [16, 51]. Stable clones were selected and maintained with 0.2 mg/ml G418 (11811031, Invitro) in F12/DMEM mixture.

For experiments including sec $\beta_1$  the CHO $\beta_1$  cells were seeded in 24 wells plates and after 90 minutes the monolayer was washed three times with PBS and a serum free medium with or without sec $\beta_1$  was added. The next day the medium was replaced with a medium containing ouabain and sec $\beta_1$ .

The kinase inhibitors used were against cSrc (Dasatinib 100nM), AKT (Perifosine 10 $\mu$ M), ERK1/2 (U0126, 10 $\mu$ M) (0952, 14240 and 9903, respectively, Cell Signaling Technologies) and pNaKtide (1 $\mu$ M, kind gift of Dr. Z. Xie, Marshall Institute for Interdisciplinary Research). Inhibitors were added 1 h before ouabain treatment.

### Antibodies

The primary antibodies used were: mouse anti- $\alpha_1$ -subunit of the Na<sup>+</sup>,K<sup>+</sup>-ATPase (7671, Abcam). Mouse anti- $\beta_1$ -subunit of the Na<sup>+</sup>,K<sup>+</sup>-ATPase (kind gift of Dr. M. Caplan, Yale University). Rabbit anti-phospho-Akt (Ser473, D9E), rabbit anti-phospho-p44/42 MAPK (Erk1/2, Thr202/Tyr204, D13.14.4E); rabbit anti-phospho-Src Family (Tyr416, D49G4); rabbit anti-Akt (pan, C67E7); rabbit anti-p44/42 MAPK (Erk1/2, 137F5), and rabbit anti-Src (36D10) (4060, 4370, 6943, 4691, 4695, and 2109, respectively, Cell Signaling Technologies).

The secondary antibodies used were: goat anti-rabbit IgG, and goat anti-mouse IgG coupled to HRP (65-6120 and 62-6520, respectively, Thermo Fisher Scientific). Goat anti-mouse IgG Alexa 488-conjugated (A11094, Molecular Probes).

### **Immunofluorescence and confocal microscopy analyses**

CHO and MDCK cells grown on coverslips at the indicated conditions in the figures, were immunostained as previously described [46]. Briefly, the cells were washed with PBS, fixed and permeabilized with ice-cold methanol for 5 min. After washing with PBS, the cells were blocked with 3% bovine serum albumin for 1 h, followed by 1 h incubation with a mouse primary antibody against the  $\beta_1$  subunit of the  $\text{Na}^+, \text{K}^+$ -ATPase (1:50 dilution) at room temperature. Cells were washed 10 times quickly with PBS, and incubated with a goat anti-mouse Alexa 488 secondary antibody (1:500 dilution) for 30 min at room temperature. After washing, the cells were mounted on glass slides with FluoroGuard antifade reagent (170–3140, BioRad). Samples were imaged using a confocal microscope (Leica TCS SP8), and visualized using the Leica Lite software. The relative fluorescence intensity was quantified using Fiji 1.0 software.

### **Western blot analysis**

Monolayers of CHO cells grown on multi-well plates were washed 3 times with ice-cold PBS and incubated in RIPA buffer (24948A, Santa Cruz) with protease inhibitors (2498, Santa Cruz) for 30 min under continuous and vigorous shaking. After that the cells were scraped and collected into a 1.5 ml microcentrifuge tube. The cell extract was homogenized with insulin syringe and centrifuged at  $17,700 \times g$  for 10 min. The supernatant was recovered, and protein concentration was quantified by BCA as indicated by the manufacturer (23225, Pierce Chemical). Thirty  $\mu\text{g}$  of protein were separated on 10% SDS-PAGE gels, electro-transferred onto a PVDF membrane (RPN 303F, Hybond-P Amersham Biosciences), and detected using the indicated primary (anti- $\alpha_1$ -subunit of the  $\text{Na}^+, \text{K}^+$ -ATPase (1:2000), mouse anti- $\beta_1$ -subunit of the  $\text{Na}^+, \text{K}^+$ -ATPase (1:500). Rabbit anti-phospho-Akt (1:2000), rabbit anti-phospho-p44/42 MAPK (1:2000), rabbit anti-phospho-Src Family (1:2000), rabbit anti-Akt (1:2000), rabbit anti-p44/42 MAPK (1:2000), and rabbit anti-Src (1:2000) and appropriate secondary antibodies (goat anti-rabbit IgG, and goat anti-mouse IgG coupled to HRP (1:10000) and goat anti-mouse IgG Alexa 488-conjugated (1:10000). Membranes were developed with ECL PLUS (RPN2132, Amersham Biosciences). Immunoblots were imaged by FUSIONFX (Vilber), and ChemiDocXRS (BioRad) and quantified by densitometry using Fiji 1.0 software.

### **Cell surface Biotinylation**

Confluent monolayers of CHO $\beta_1$  cells were depleted of serum for 24 h and then incubated with or without 50 nM ouabain for 24 h. Then, the monolayers were washed 3 times with PBS, and incubated with 1 mg/ml of EZ-Link Sulfo-NHS-SS-Biotin (21331, Thermo scientific) for 30 min. Subsequently the monolayers were washed 3 times with PBS containing 100 mM glycine to quench the excess of Biotin, followed by a final wash with PBS containing 1% Triton X-100

and protease inhibitors. After 30 min, the cells were scraped, and the cell lysate collected into a 1.5 ml microcentrifuge tubes. The extract was homogenized by passing it 10 times through insulin syringe and centrifuged for 10 min at 9,000 x g at 4 °C. The supernatant was recovered, and the protein content was measured using the BCA protein assay method. The biotinylated extracts were incubated overnight at 4 °C with 100 µl of streptavidin-agarose suspension (S1638, Sigma). The next day, bead-adherent complexes were washed 5 times with PBS, and finally the proteins were eluted in 2X Laemmli buffer and boiling for 5 min.

### **Cell adhesion assay (Dispase assay)**

Confluent Monolayers of CHOβ<sub>1</sub> cells seeded on 24 well plates were depleted of serum for 24 h, and then incubated with or without ouabain (50nM) for 24 h. Then the monolayers were washed with ice-cold PBS, and detached from the plates by incubation with PBS without Ca<sup>2+</sup> supplemented with 0.6 U/ml of Dispase I (D4818, Sigma) for 35 min at 37 °C. Subsequently the Dispase solution was carefully removed using a 200 µl pipette tip, and replaced by 100 µl of PBS. The cells were then mechanically stressed by pipetting up and down 5 times using a 200 µl pipette. The resulting aggregates were visualized by light microscopy using the 10 X and 20 X objectives (Axiovert 200M Fluorescence/Live Cell Imaging, Carl Zeiss). Three independent biological replicates were imaged using the AxioVision 4.8 software. The number of aggregates was counted using the Fiji 1.0 software cell counter (aggregates <200µm<sup>2</sup> were excluded from the quantification).

### **Pull Down assay (PD)**

Total extract of CHO cells expressing the β<sub>1</sub>His<sub>6</sub> construct were immobilized with nickel-nitrilotriacetic acid beads (Ni<sup>+</sup>-NTA, His Trap FF column; GE Healthcare) equilibrated with 10 ml of RIPA buffer containing protease inhibitors. Total protein extracts (500 µg) were loaded into the resin, and allowed to interact for 3 h at 4°C with gentle shaking. Then the unbound protein was washed as indicated by the manufacturer, and the total extract of CHOβ<sub>1</sub> YFP cells incubated in the presence or absence of ouabain (50 nM and 100 µM) were loaded as a prey. Samples were incubated overnight at 4°C, and washed with PBS supplemented with 10 and 20 mM imidazole. Interacting proteins were eluted in PBS containing 500 mM imidazole and were analyzed by western blot.

### **Statistical analysis**

GraphPad Prism version 7.00 software was used for all statistical analyses. The data are presented, as the mean ± SEM or SD as indicated in the figures. Statistical significance was determined using ANOVA one way and Kruskal Wallis test, and *t*-test for two conditions. *P* ≤ 0.05 was considered significant.

**Author Contributions:** Conceptualization, L.S. and C.A.V-N.; methodology, CA V-N.; investigation, C.A. V-N. and M.L. R.; resources, L.S. and T P-B.; writing—original draft preparation, L.S. and CA V-N.; writing—review and editing,

L.S and T.P-B.; supervision, L.S and T.P-B.; project administration, L.S.; funding acquisition, L.S and T.P-B.

**Funding:** This work was supported by research grant (L.S.) and research fellowship (C.A. V-N) from CONACYT (National Research Council of México) and by the Faculty Diversity Scholars Award from the University of Massachusetts Medical School, to T.P.-B.

**Acknowledgments:** The authors thank Xie Z. for the pNaKtide and Rosalia Aguirre for her dedicated technical assistance.

**Conflicts of Interest:** The authors declare no conflict of interest. The founding sponsors had no role in the design of the study; in the collection, analyses, or interpretation of data; in the writing of the manuscript, and in the decision to publish the results.

## References

1. Skou, J. C. The influence of some cations on an adenosine triphosphatase from peripheral nerves. *Biochim. Biophys. Acta.*1957, 1000, 439–446,
2. Post, R.L.; Sen, A.K.; Rosenthal, A.S. A phosphorylated intermediate in adenosine triphosphate dependent sodium and potassium transport across kidney membranes. *J Biol Chem*, .1965, 240:1437-45.
3. Post, R.L.; Hegyvary, C.; Kume, S. Activation by adenosine triphosphate in the phosphorylation kinetics of sodium and potassium ion transport adenosine triphosphatase. *J. Biol. Chem.* 1972, 247, 6530–6540
4. Therien, A.G.; Blostein R. Mechanisms of sodium pump regulation. *Am. J. Physiol. Cell Physiol.* 2000, 279, C541–C566 DOI:10.1152/ajpcell.2000.279.3.C541
5. Morth, J.P.; Pedersen, B.P.; Toustrup-Jensen, M.S; Sørensen, T.L.; Petersen. J.; Andersen, J.P.; Vilsen, B.; Nissen, P. Crystal structure of the sodium-potassium pump. *Nature.* 2007, 13;450(7172):1043-9. DOI:10.1038/nature06419
6. Blanco, G. Na, K-ATPase Subunit Heterogeneity as a Mechanism for Tissue-Specific Ion Regulation. *Semin Nephrol.* 2005, 25 (5)292 - 303
7. Geering, K. Functional roles of NaK ATPase subunits. *Curr. Opin. Nephrol. Hypertens.* 2008,17(5):526-32. DOI: 10.1097/MNH.0b013e3283036cbf.
8. Bagrov, A.Y.; Shapiro, J.I.; Fedorova, O.V.. Endogenous cardiotonic steroids: physiology, pharmacology, and novel therapeutic targets. *Pharmacol. Rev.* 2009, 61(1):9-38. DOI: 10.1124/pr.108.000711
9. Chow, D.C.; Forte, J.G.; Functional significance of the beta-subunit for heterodimeric P-type ATPases. *J. Exp. Biol.* 1995,198(Pt 1):1-17.



10. Geering, K. The functional role of beta subunit in oligomeric P-ATPases. *J. Bioenerg. Biomembr.* 2001, 33:425-438
11. Dempsey, R.E.; Friedrich, T.; Bamberg, E. The beta subunit of the Na<sup>+</sup>/K<sup>+</sup>-ATPase follows the conformational state of the holoenzyme. *J. Gen. Physiol.* 2005, 125(5):505-20. DOI: 10.1085/jgp.200409186
12. Crambert, G.; Hasler, U.; Beggah, A.T.; Yu, C. Modyanov, N.N.; Horisberger, J. D.; Lelièvre, L.; Geering, K. Transport and pharmacological properties of nine different human Na, K-ATPase isoforms. *J. Biol. Chem.* 2000, 275(3):1976-86. DOI: 10.1074/jbc.275.3.1976
13. Rajasekaran, S.A.; Palmer, L.G.; Quan, K.; Harper, J.F.; Ball, W. J.Jr.; Bander, N.H.; Peralta Soler, A.; Rajasekaran, A.K. Na,K-ATPase beta-subunit is required for epithelial polarization, suppression of invasion, and cell motility. *Mol. Biol. Cell.* 2001, 12(2):279-95. DOI:10.1091/mbc.12.2.279
14. Espineda, C.E.; Chang, J.H.; Twiss, J.; Rajasekaran, S. A.; Rajasekaran, A.K. Repression of Na,K-ATPase beta1-subunit by the transcription factor snail in carcinoma. *Mol. Biol. Cell.* 2004, 15(3):1364-73. DOI:10.1091/mbc.e03-09-0646
15. Madan, P.; Rose, K.; Watson, A.J. Na/K-ATPase  $\beta_1$  subunit expression is required for blastocyst formation and normal assembly of trophectoderm tight junction-associated proteins. *J. Biol. Chem.* 2007, 282: 12127–34. DOI: 10.1074/jbc.M700696200
16. Padilla-Benavides, T.; Roldán, M.L.; Larre, I.; Flores-Benitez, D.; Villegas-Sepúlveda, N.; Contreras, R.G.; Cereijido, M.; Shoshani, L. The polarized distribution of Na<sup>+</sup>,K<sup>+</sup>-ATPase: role of the interaction between {beta} subunit. *Mol. Biol. Cell.* 2010, 21(13):2217-25. DOI:10.1091/mbc.e10-01-0081
17. Tokhtaeva, E.; Sachs, G.; Souda, P.; Bassilian, S.; Whitelegge, J.P.; Shoshani, L.; Vagin, O. Epithelial junctions depend on intercellular trans-interactions between the Na,K-ATPase  $\beta_1$  subunits. *J. Biol. Chem.* 2011, 286(29):25801-12. DOI: 10.1074/jbc.M111.252247
18. Gloor, S.; Antonicek, H.; Sweadner, K.J.; Pagliusi, S.; Frank, R.; Moos, M.; Schachner, M. The adhesion molecule on glia (AMOG) is a homologue of the beta subunit of the Na,K-ATPase. *J. Cell. Biol.* 1990, 110(1):165-74. DOI: 10.1083/jcb.110.1.165
19. Askari, A.; Kakar, S.S.; Huang, W.H. Ligand binding sites of the ouabain-complexed (Na<sup>+</sup> + K<sup>+</sup>)-ATPase. *J. Biol. Chem.* 1988, 263(1):235-42
20. Hamlyn, J.M.; Blaustein, M.P.; Bova, S.; DuCharme, D.W.; Harris, D.W.; Mandel, F. Identification and characterization of a ouabain-like compound from human plasma. *Proc. Natl. Acad. Sci.* 1991, 88: 6259-6263.
21. Laursen, M.; Gregersen, J.L.; Yatime, L.; Nissen, P.; Fedosova, N. U.; Structures and characterization of digoxin and bufalin-bound Na<sup>+</sup>,K<sup>+</sup>-ATPase compared with the ouabain-bound complex. *Proc. Natl. Acad. Sci.* 2014, 111(6):1755-60. DOI: 10.1073/pnas.1422997112.

22. Aizman, O.; Uhlen, P.; Lal, M.; Brismar, H.; Aperia, A.. Ouabain, a steroid hormone that signals with slow calcium oscillations. *Proc. Natl. Acad. Sci.* 2001, 98: 13420–13424. DOI:10.1073/pnas.221315298
23. Haas, M.; Askari, A.; Xie, Z. Involvement of Src and epidermal growth factor receptor in the signal-transducing function of Na<sup>+</sup>, K<sup>+</sup>-ATPase. *J. Biol. Chem.* 2000, 275: 27832–27837. DOI: 10.1074/jbc.M002951200
24. Li, J.; Zelenin, S.; Aperia, A.; Aizman, O. Low doses of ouabain protect from serum deprivation-triggered apoptosis and stimulate kidney cell proliferation via activation of NF-κB. *J. Am. Soc. Nephrol.* 2006, 17: 1848–1857. DOI: 10.1681/ASN.2005080894
25. Liu, J.; Liang, M.; Liu, L.; Malhotra, D.; Xie, Z.; Shapiro, J.I. Ouabain-induced endocytosis of the plasmalemmal Na<sup>+</sup>, K<sup>+</sup>-ATPase in LLC-PK1 cells requires caveolin. *Kidney Int.* 2005, 67:1844–1854. DOI:10.1111/j.1523-1755.2005.00283.x
26. Larre, I.; Cereijido, M. Na<sup>+</sup>,K<sup>+</sup>-ATPase is the putative membrane receptor of hormone ouabain. *Commun. Integr. Biol.* 2010b, 3(6):625-628. DOI:10.4161/cib.3.6.13498
27. Liu, L.; Zhao, X.; Pierre, S.V.; Askari, A. Association of PI3K-Akt signaling pathway with digitalis-induced hypertrophy of cardiac myocytes. *Am. J. Physiol. Cell Physiol.* 2007, 293: 1489–1497. DOI:10.1152/ajpcell.00158.2007
28. Tian, J.; Li, X.; Liang, M.; Liu, L.; Xie, J. X.; Ye, Q.; Kometiani, P.; Tillerkeratne, M.; Jin, R.; Xie, Z. Changes in sodium pump expression dictate the effects of ouabain on cell growth. *J. Biol. Chem.* 2009, 284(22):14921-9. DOI: 10.1074/jbc.M808355200
29. Larre, I.; Lazaro, A.; Contreras, R.G.; Balda, M.S.; Matter, K.; Flores-Maldonado, C.; Ponce, A.; Flores-Benitez, D.; Rincon-Heredia, R.; Padilla-Benavides, T. Castillo, A.; Shoshani, L.; Cereijido, M. Ouabain modulates epithelial cell tight junction. *Proc Natl Acad Sci.* 2010a, 107(25): 11387–11392. DOI:10.1073/pnas.1000500107
30. Tian, J.; Cai, T.; Yuan, Z.; Wang, H.; Liu, L.; Haas, M.; Maksimova, E.; Huang, X.Y.; Xie, Z.J.; Binding of Src to Na<sup>+</sup>, K<sup>+</sup>-ATPase forms a functional signaling complex. *Mol Biol Cell.* 2006, 17:317–326. DOI: 10.1091/mbc.e05-08-0735
31. Liang, M.; Tian, J.; Liu, L.; Pierre, S.; Liu, J.; Shapiro, J.; Xie, Z.; Identification of a Pool of Non-pumping Na/K-ATPase. *J. Biol. Chem.* 2007, 282:10585-10593 DOI: 10.1074/jbc.M609181200
32. Mathews, W.R.; DuCharme, D.W.; Hamlyn, J.M.; Harris, D.W.; Mandel F.; Clark, M.A.; Ludens, J.H. Mass spectral characterization of an endogenous digitalislike factor from human plasma. *Hypertension.* 1991, 17(6 Pt 2):930-935
33. Ludens, J.H.; Clark, M.A.; DuCharme, D.W.; Harris, D.W.; Lutzke, B.S.; Mandel, F.; Mathews, W.R.; Sutter, D.M.; Hamlyn, J.M. Purification of an endogenous digitalislike factor from human plasma for structural analysis. *Hypertension.* 1991, 17(6 Pt 2):923-929

34. El-Masri, M.A.; Clark, B.J.; Qazzaz, H.M.; Valdes, R. Jr. Human adrenal cells in culture produce both ouabain-like and dihydroouabain-like factors Clin Chem. 2002, 48(10):1720-30
35. Laredo, J.; Hamilton, B.P.; Hamlyn, J.M. Secretion of endogenous ouabain from bovine adrenocortical cells: role of the zona glomerulosa and zona fasciculata. Biochem. Biophys. Res. Commun. 1995, 17;212(2):487-93 DOI:10.1006/bbrc.1995.1996
36. Doris, P. A.; Hayward-Lester, A.; Bourne, D.; Stocco, D.M. Ouabain production by cultured adrenal cells. Endocrinology. 1996, 137(2):533-539.
37. Qazzaz, H.M.; Cao, Z.; Bolanowski, D.D.; Clark, B.J.; Valdes, R. Jr. De novo biosynthesis and radiolabeling of mammalian digitalis-like factors. Clin Chem. 2004, 50(3):612-20. DOI: 10.1373/clinchem.2003.022715
38. Bauer, N.; Müller-Ehmsen, J. Krämer, U.; Hambarchian, N.; Zobel, C.; Schwinger, R.H.; Neu, H.; Kirch, U., Grünbaum, E.G.; Schoner, W. Ouabain-like compound changes rapidly on physical exercise in humans and dogs: effects of beta-blockade and angiotensin-converting enzyme inhibition. Hypertension. 2005, 45(5):1024-1028. DOI: 10.1161/01.HYP.0000165024.47728.f7
39. Fedorova, O.V.; Lakatta, E.G.; Bagrov, A.Y. Endogenous Na,K pump ligands are differentially regulated during acute NaCl loading of Dahl rats. Circulation. 2000, 12;102(24):3009-14.
40. Fedorova, O.V.; Kolodkin, N.I.; Agalakova, N.I.; Namikas, A.R.; Bzhelyansky, A.; St-Louis, J.; Lakatta, E.G.; Bagrov, A.Y. Antibody to marinobufagenin lowers blood pressure in pregnant rats on a high NaCl intake. J. Hypertens. 2005a, 23(4):835-842. DOI: 10.1097/01.hjh.0000163153.27954.33
41. Fedorova, O.V.; Agalakova, N.I.; Talan, M.I.; Lakatta, E.G., Bagrov, A.Y. Brain ouabain stimulates peripheral marinobufagenin via angiotensin II signalling in NaCl-loaded Dahl-S rats. J Hypertens. 2005b, 23(8):1515-23. DOI: 10.1097/01.hjh.0000174969.79836.8b
42. Gottlieb, S.S.; Rogowski, A.C.; Weinberg, M.; Krichten, C.M.; Hamilton B.P.; Hamlyn, J.M. Elevated concentrations of endogenous ouabain in patients with congestive heart failure. Circulation. 1992, 86(2):420-425.
43. Manunta, P.; Ferrandi, M.; Bianchi, G.; Hamlyn, J.M. Endogenous ouabain in cardiovascular function and disease. J Hypertens. 2009, (1):9-18. DOI: 10.1097/HJH.0b013e32831cf2c6
44. Rincon-Heredia, R.; Flores-Benitez, D.; Flores-Maldonado, C.; Bonilla-Delgado, J.; García-Hernández, V.; Verdejo-Torres, O.; Castillo, A.; Larré, I.; Poot-Hernández, C.A.; Franco, M.; Gariglio, P.; Reyes, J.; Contreras, R.G. Ouabain induces endocytosis and degradation of tight junction proteins through ERK1/2-dependent path ways. Exp. Cell. Res. 2014, 320(1): 108–118 doi:10.1016/j.yexcr.2013.10.008.
45. Ponce, A.; Larre, I.; Castillo, A.; García-Villegas, R.; Romero, A.; Flores-Maldonado, C.; Martinez- Redón, J.; Contreras, R.G.; Cereijido, M.

- Ouabain Increases Gap Junctional Communication in Epithelial Cells. *Cell Physiol Biochem.* 2014, 34:2081-2090. DOI: 10.1159/000366403
46. Shoshani, L.; Contreras, R.G.; Roldán, M.L.; Moreno, J.; Lázaro, A. Balda, M.S.; Matter, K.; Cereijido, M. The polarized expression of Na<sup>+</sup>,K<sup>+</sup>-ATPase in epithelia depends on the association between beta-subunits located in neighboring cells. *Mol. Biol. Cell.* 2005,16(3):1071-81. DOI:10.1091/mbc.e04-03-0267
47. Vagin, O.; Dada, L.A.; Tokhtaeva, E.; Sachs, G.; The Na-K-ATPase  $\alpha_1 \beta_1$  heterodimer as a cell adhesion molecule in epithelia. *Am. J. Physiol. Cell. Physiol.* 2012, 302: C1271–C1281. DOI: 10.1152/ajpcell.00456.2011.
48. Vagin, O.; Turdikulova, S.; Sachs, G. Recombinant Addition of N-Glycosylation Sites to the Basolateral Na,K-ATPase  $\alpha_1$  Subunit Results in Its Clustering in Caveolae and Apical Sorting in HGT-1 Cells. *J. Biol. Chem.* 2005, 280:43159-43167. DOI: 10.1074/jbc.M508262200
49. Hong, S.; Troyanovsky, R.B.; Troyanovsky, S.M. Spontaneous assembly and active disassembly balance adherens junction homeostasis. *Proc. Natl. Acad. Sci.* 2010,107:3528–3533. doi:10.1073/pnas.0911027107
50. Hamrick, M.; Renaud, K. J.; Fambrough, D. M.. Assembly of the extracellular domain of the Na, K-ATPase beta subunit with the alpha sub- unit. Analysis of beta subunit chimeras and carboxyl-terminal deletions. *J. Biol. Chem.* 1993, 268, 24367–24373.
51. Tokhtaeva, E.; Sun, H.; Deiss-Yehiely, N.; Wen, Y.; Soni, P.N.; Gabrielli, N.M.; Marcus, E.A.; Ridge, K.M.; Sachs, G.; Vazquez-Levin, M.; Sznajder, J.I.; Vagin, O.; Dada, L.A. The O-glycosylated ectodomain of FXD5 impairs adhesion by disrupting cell-cell trans-dimerization of Na,K-ATPase  $\beta_1$  subunits. *J Cell Sci.* 2016,15;129(12):2394-2406. DOI: 10.1242/jcs.186148
52. Juliano, R.L.. Adhesion and detachment characteristics of Chinese hamster cell membrane mutants. *J Cell Biol*1978, 76(1):43-49 DOI: 10.1083/jcb.76.1.43
53. Harper, P.A. and Juliano, R.L. Isolation and Characterization of Chinese Hamster Ovary Cell Variants Defective in Adhesion to Fibronectin-coated Collagen. *J Cell Biol.* 1980, 87(3), 755-763. DOI: 10.1083/jcb.87.3.755
54. Wang, H.; Haas, M.; Liang, M.; Cai, T.; Tian, J.; Li, S.; Xie, Z. Ouabain Assembles Signaling Cascades through the Caveolar Na/K ATPase, 2004, JBC, DOI 10.1074/jbc.M31323920.
55. Rocha, S.C.; Pessoa, M.T.C.; Neves, L.D.R.; Alves, S.L.G.; Silva, L.M., et al. 21-Benzylidene Digoxin: A Proapoptotic Cardenolide of Cancer Cells That Up-Regulates Na,K-ATPase and Epithelial Tight Junctions. *PLoS ONE.* 2014, 9(10): e108776. DOI:10.1371/journal.pone.0108776
56. Contreras, R.G.; Shoshani, L.; Flores-Maldonado, C.; Lazaro, A.; Cereijido, M. Relationship between Na<sup>+</sup>,K<sup>+</sup>-ATPase and cell attachment. *J. Cell. Sci.* 1999, 112:4223-4232.
57. Xie, Z. Molecular mechanisms of Na/K-ATPase-mediated signal transduction. *Ann N Y Acad Sci.* 2003, 986:497-503. DOI:10.1111/j.1749-6632.2003.tb07234.x

58. Ponce, A.; Larre, I.; Castillo, A.; Flores-Maldonado, C.; Verdejo-Torres, O.; Contreras, R.G.; Cereijido, M.. Ouabain Modulates the Distribution of Connexin 43 in Epithelial Cells. *Cell. Physiol. Biochem.* 2016, 39(4):1329-38. DOI: 10.1159/000447837.
59. Haas, M.; Wang, H.; Tian, J.; Xie, Z. Src-mediated inter-receptor cross-talk between the Na<sup>+</sup>/K<sup>+</sup>-ATPase and the epidermal growth factor receptor relays the signal from ouabain to mitogen-activated protein kinases. *J. Biol. Chem.* 2002, 277(21):18694–18702. DOI: 10.1074/jbc.M111357200
60. Li, Z.; Cai, T.; Tian, J.; Xie, J.X.; Zhao, X. Liu L, Shapiro JI, Xie Z. NaKtide, a Na/K ATPase derived peptide Src inhibitor antagonizes ouabain-activated signal transduction in cultured cells. *J. Biol. Chem.* 2009, 284(31):21066-76. DOI: 10.1074/jbc.M109.013821
61. McNeill, H.; Ozawa, M.; Kemler, R.; Nelson, W.J. Novel Function of the Cell Adhesion Molecule Uvomorulin As An Inducer of Cell-Surface Polarity. *Cell.* 1990, 62:309-316. DOI:10.1016/0092-8674(90)90368-O
62. Cereijido, M.; Stefani, E.; Palomo, A.M. Oclusiones en un epitelio transportador cultivado: heterogeneidad estructural y funcional. *J. Membr. Biol.* 1980, 53;19–32.
63. Antolović, R. Low nanomolar concentrations of ouabain may induce higher activity of the Na<sup>+</sup>/K<sup>+</sup>-ATPase in human erythrocytes. *Vet Arhiv.* 2006, 76 (6):489-495.
64. Oselkin, M.; Tian, D.; Bergold, P.J. Low-dose cardiotonic steroids increase sodium-potassium ATPase activity that protects hippocampal slice cultures from experimental ischemia. *Neurosci. Lett.* 2010 5;473(2):67-71. DOI: 10.1016/j.neulet.2009.10.021
65. Tian, J.; Li, X.; Liang, M.; Liu, L.; Xie, J.X.; Ye, Q.; Kometiani, P.; Tillekeratne, M.; Jin, R.; Xie, Z. Changes in sodium pump expression dictate the effects of ouabain on cell growth. *J. Biol. Chem.* 2009, 284:14921–14929. DOI: 10.1074/jbc.M808355200
66. Dempski, R.E.; Hartung, K.; Friedrich, T.; Bamberg, E. Fluorometric measurements of intermolecular distances between the alpha- and beta-subunits of the Na<sup>+</sup>/K<sup>+</sup>-ATPase. *J Biol Chem.* 2006, 281(47):36338-46. DOI: 10.1074/jbc.M604788200
67. Dempski, R.E.; Friedrich, T.; Bamberg, E. The beta subunit of the Na<sup>+</sup>/K<sup>+</sup>-ATPase follows the conformational state of the holoenzyme. *J Gen Physiol.* 2005, 125(5):505-520. DOI: 10.1085/jgp.200409186
68. Klimanova, E.A.; Petrushanko, I.Y.; Mitkevich, V.A.; Anashkina, A.A.; Orlov, S.N.; Makarov, A.A.; Lopina, O.D. Binding of ouabain and marinobufagenin leads to different structural changes in Na,K-ATPase and depends on the enzyme conformation. *FEBS. Lett.* 2015, 589(19 Pt B):2668-74. DOI: 10.1016/j.febslet.2015.08.011
69. Cereijido, M.; Contreras, R.G.; Shoshani, L.; Larre, I. The Na<sup>+</sup>-K<sup>+</sup>-ATPase as self-adhesion molecule and hormone receptor. *Am. J. Physiol. Cell. Physiol.* 2012, 302:C473-C481. DOI: 10.1152/ajpcell.00083.2011



70. Aperia, A.; Akkuratov, E.E.; Fontana, J.M.; Brismar, H. Na<sup>+</sup>-K<sup>+</sup>-ATPase, a new class of plasma membrane receptors. *Am J. Physiol. Cell. Physiol.* 2016, 310(7):C491-5. DOI: 10.1152/ajpcell.00359.2015
71. Rajasekaran, S. A.; Gopal, J.; Willis, D.; Espineda, C.; Twiss, J. L.; Rajasekaran, A. K. Na,K-ATPase beta1-subunit increases the translation efficiency of the alpha1-subunit in MSV-MDCK cells. *Mol. Biol. Cell.* 2004, 15(7), 3224-32. DOI: 10.1091/mbc.E04-03-0222
72. Caplan, M.J.; Anderson, H.C.; Palade, G.E.; Jamieson, J.D. Intracellular sorting and polarized cell surface delivery of (Na<sup>+</sup>,K<sup>+</sup>)ATPase, an endogenous component of MDCK cell basolateral plasma membranes. *Cell.* 1986, 15;46(4):623-31. [https://doi.org/10.1016/0092-8674\(86\)90888-3](https://doi.org/10.1016/0092-8674(86)90888-3)
73. Liu, L.; Zhao, X.; Pierre, S.; Askari, A. Association of PI3K-Akt signaling pathway with digitalis-induced hypertrophy of cardiac myocytes. *Am. J. Physiol.* 2007, 293; C1489-C1497
74. Wu, J.; Akkuratov, E.E.; Bai, Y.; Gaskill, C.M.; Askari, A.; Lui, L. Cell Signaling Associated with Na<sup>+</sup>/K<sup>+</sup>-ATPase: Activation of Phosphatidylinositol 3-Kinase IA/Akt by Ouabain Is Independent of Src. *Biochemistry.* 2013, 52 (50), 9059-9067 DOI: 10.1021/bi4011804
75. Feng, W.; Webb, P.; Nguyen, P.; Liu, X.; Li, J.; Karin, M.; Kushner, P.J. Potentiation of Estrogen Receptor Activation Function 1 (AF-1) by Src/JNK through a Serine 118-Independent. *Mol Endocrinol.* 2001, 15 (1);, 32–45. <https://doi.org/10.1210/mend.15.1.0590>
76. Madan, N., Xu, Y., Duan, Q., Banerjee, M., Larre, I., Pierre, S. V., & Xie, Z. 2016. Src-independent ERK signaling through the rat α3 isoform of Na/K-ATPase. *Am J Physiol Cell Physiol* 312(3), C222-C232.
